# Supplementary material for: Automatic microdispenser-integrated multiplex enzyme-linked immunosorbent assay device with autonomously driven centrifugal microfluidic system
Source: Royal Society of Chemistry journal article supplement (doi:10.1039/d4ra02656j), 2024-01-01
Supplement: d4ra02656j1.pdf [file d4ra02656j1.pdf]

## 1 Supplementary information

### 2 Image analysis for measuring flow rate in a dispenser

3 After binarizing the captured images and identifying the liquid's portions, the difference  
4 between the number of pixels and the period between consecutive captures was used to  
5 calculate the increase or decrease in the number of pixels (corresponding to the liquid's area)  
6 per unit of time. Additionally, the liquid's height and area were multiplied to determine the  
7 flow rate.

8 By identifying the value at which the area difference becomes the smallest value when  
9 compared to the liquid area of the captured image, the threshold value of binarization was  
10 established using the CAD data used for the photo mask. Notably, the captured image had  
11 liquid in several regions, making it possible to precisely determine the meniscus's location.  
12 Moreover, the conversion between pixels and actual distance was achieved by comparison. The  
13 liquid's height was calculated by averaging several measurements of the microchannels' depth.

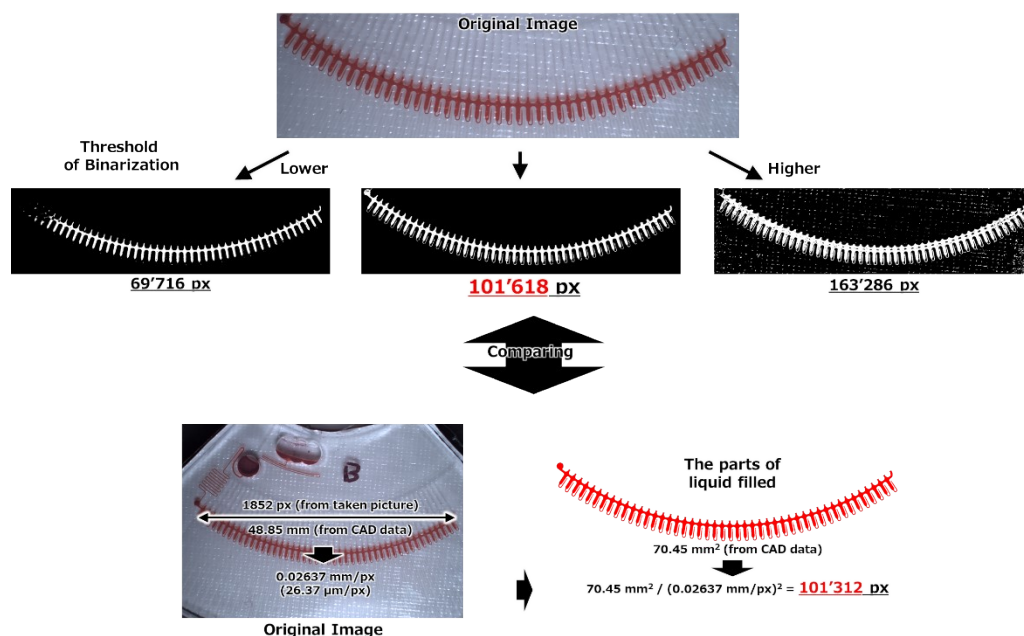

14

15 **Fig. S1 Methods for conversion between pixel and actual distance and area in image analysis**

16

17 **Operation principle of CLOCK circuit**

18 CLOCK circuits played roles of control for injection timing of reagents (washing  
 19 solution, and TMB substrate) into the dispenser. The principle of operation is shown below.

20 The channel of each reagent was composed of a primary reservoir, resistance channel,  
 21 secondary reservoir, and siphon valve from upstream. A reagent which was controlled injection  
 22 timing, was applied into the primary reservoir. By stating rotation, the reagents started to flow  
 23 into the secondary reservoir through the resistance channel. The reagent was kept in the  
 24 reservoir because the siphon valve was placed downstream the secondary reservoir. Then,  
 25 when the reservoir was filled, the siphon valve burst, and the reagent was injected into the  
 26 dispenser. Therefore, the injection timing can be controlled by adopting the flow rate in the  
 27 resistant channel by adjusting the resistance such as the diameter or length of the channel. The  
 28 flow rate can be calculated with below equation.

$$29 \quad Q = P/R = \left[ \rho \omega^2 (R_{outer} - R_{inner}) \left( \frac{R_{outer} + R_{inner}}{2} \right) \right] / [16\eta L / A d_H^2]$$

30 where  $\rho$  denotes the working liquid density,  $\omega$  denotes the angular velocity,  $A$  and  $d_H$  denote  
 31 the cross-sectional area and equivalent diameter ( $= 4HW / (H + W)$ ) of the microchannel,  
 32 respectively, and  $R_{outer}$  and  $R_{inner}$  denote the distance to the leading meniscus or upstream  
 33 meniscus from the rotation center. The volume of the secondary reservoir was determined by

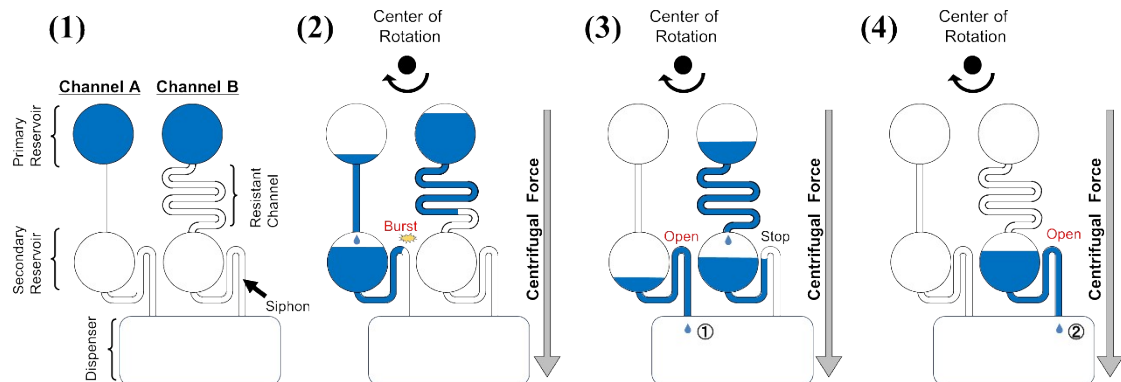

34 a mount of reagent which is used.

35 **Fig. S2 Operation principle of CLOCK circuit**

36 **Device fabrication**

37 We fabricated PDMS microchips for prototyping device in this paper. The  
38 fabrication method of multiplexed ELISA device is shown below.

39 The microfluidic chips were fundamentally fabricated using general  
40 photolithography and soft lithography methods. First, microchannels and footprints of  
41 chambers were patterned on a 4-inch Si wafer by a photolithography as shown in Fig. S3(b).  
42 We used some ways to form reservoirs and chambers. Reaction chambers and secondary  
43 reservoirs were formed the shape on the photoresist (Fig. (c)), and the shapes were transferred  
44 to PDMS chips by soft lithography as shown in Fig. (d). Reaction chamber's shape was  
45 formed with a reflow process using wax, and secondary reservoir's shape was formed by  
46 mounting cut PMMA parts with a double side tape. Other chambers such as primary  
47 reservoirs, sample/standard inlet, and waste chambers were formed by punching out the  
48 PDMS chip after the soft lithography as shown in Fig. (e). Open face of Microchannels, each  
49 chamber and reservoir were closed by bonding a flat PDMS sheet as shown in Fig. (f). Then,  
50 the chip was set onto a CD substrate, and the surface of chips (without vent holes and the  
51 insert of micro pipette) were covered with clear adhesive tapes as shown in Fig. (g).

52

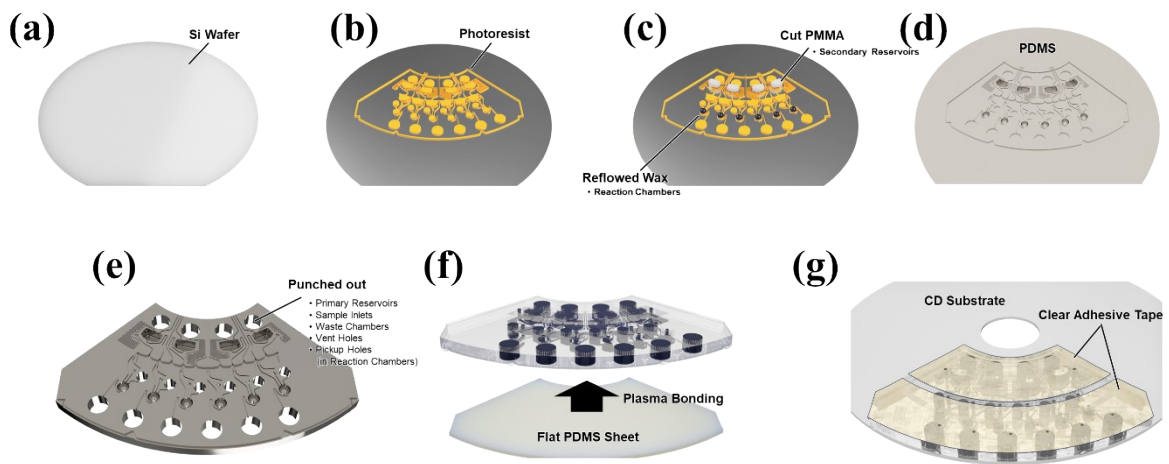

53

54

**Fig. S3 Schematic of chip fabrication process**
